# Supplementary material for: Mediating effects of self-stigma and depression on the association between autistic symptoms and recovery in patients with schizophrenia-spectrum disorders: a cross-sectional study
Source: BMC Psychiatry. 2021 Sep 23;21:464. doi: 10.1186/s12888-021-03472-z (PMC8461904; doi:10.1186/s12888-021-03472-z)
Supplement: Supplementary file 1 — Additional file 1. [file 12888_2021_3472_MOESM1_ESM.xlsx]

## Sheet: Sheet1
	Additional File 1. Spearman correlation coefficients between self-stigma, autistic, depressive symptoms, and recovery in outpatients
		ISMI total score	Alienation	Stereotype endorsement	Perceived discrimination	Social withdrawal	Stigma resistance	QIDS	RAS
	AQ total score	0.425**	0.291*	0.398**	0.366**	0.414**	0.17	0.512***	−0.479***
	Social skills	0.357**	0.21	0.261	0.216	0.28*	0.322*	0.253	−0.449**
	Attention switching	0.306*	0.252	0.283*	0.245	0.289*	0.093	0.403**	−0.239
	Attention to detail	0.086	0.125	0.098	0.112	0.196	−0.153	0.083	0.016
	Communication skills	0.299*	0.176	0.272*	0.367**	0.281*	0.104	0.472***	−0.373**
	Imagination	0.231	0.123	0.329*	0.208	0.161	0.133	0.313*	−0.409**
	QIDS	0.584***	0.472***	0.646***	0.659***	0.621**	0.099		−0.663***
	RAS	−0.685***	−0.53***	−0.673***	−0.633***	−0.556***	−0.437***	−0.663***
	Notes:
	The data show Spearman's rank correlation coefficients
	Bold values represent statistical significance at the uncorrected p < 0.05 level
	*p < 0.05, **p < 0.01, ***p < 0.001
	Abbreviations:
	AQ, Autism-Spectrum Quotient; IMSI, Internalized Stigma of Mental Illness; QIDS, Quick Inventory of Depressive Symptomatology; RAS, Recovery Assessment Scale
