# Supplementary material for: Mediating effects of self-stigma and depression on the association between autistic symptoms and recovery in patients with schizophrenia-spectrum disorders: a cross-sectional study
Source: BMC Psychiatry. 2021 Sep 23;21:464. doi: 10.1186/s12888-021-03472-z (PMC8461904; doi:10.1186/s12888-021-03472-z)
Supplement: Supplementary file 2 — Additional file 2. [file 12888_2021_3472_MOESM2_ESM.xlsx]

## Sheet: Sheet1
	Additional File 2. Spearman correlation coefficients between self-stigma, autistic, depressive symptoms, and recovery in inpatients
		ISMI total score	Alienation	Stereotype endorsement	Perceived discrimination	Social withdrawal	Stigma resistance	QIDS	RAS
	AQ total score	0.498**	0.427**	0.434**	0.499***	0.412**	−0.022	0.601***	−0.425**
	Social skills	0.289*	0.182	0.212	0.268	0.237	0.185	0.369**	−0.492***
	Attention switching	0.488***	0.471**	0.46**	0.389**	0.453**	−0.108	0.584***	−0.324*
	Attention to detail	0.059	0.094	−0.024	0.103	0.045	−0.077	−0.029	0.14
	Communication skills	0.392**	0.302*	0.29*	0.425**	0.324*	−0.017	0.551***	−0.254
	Imagination	0.238	0.26	0.262	0.239	0.168	−0.018	0.296*	−0.236
	QIDS	0.674***	0.626***	0.523**	0.664***	0.582***	−0.103		−0.415**
	RAS	−0.401**	−0.261	−0.356*	−0.257	−0.276	−0.315*	−0.415**
	Notes:
	The data show Spearman's rank correlation coefficients
	Bold values represent statistical significance at the uncorrected p < 0.05 level
	*p < 0.05, **p < 0.01, ***p < 0.001
	Abbreviations:
	AQ, Autism-Spectrum Quotient; IMSI, Internalized Stigma of Mental Illness; QIDS, Quick Inventory of Depressive Symptomatology; RAS, Recovery Assessment Scale
